# Supplementary material
Source: PubMed Central journal article supplement (PMC8366002)
Supplement: ml1c00363_si_001.pdf [file ml1c00363_si_001.pdf]

## Supporting Information

### Discovery of VU6028418: A Highly Selective and Orally Bioavailable M<sub>4</sub> Muscarinic Acetylcholine Receptor Antagonist

Matthew Spock,<sup>†,‡</sup> Trever R. Carter,<sup>†,‡</sup> Katrina A. Bollinger,<sup>†,‡</sup> Changho Han,<sup>†,‡</sup> Logan A. Baker,<sup>†,‡</sup> Alice L. Rodriguez,<sup>†,‡</sup> Li Peng,<sup>†,‡</sup> Jonathan W. Dickerson,<sup>†,‡</sup> Aidong Qi,<sup>†,‡</sup> Jerri M. Rook,<sup>†,‡</sup> Jordan C. O'Neill,<sup>†,‡</sup> Katherine J. Watson,<sup>†,‡</sup> Sichen Chang,<sup>†,‡</sup> Thomas M. Bridges,<sup>†,‡</sup> Julie L. Engers,<sup>†,‡</sup> Darren W. Engers,<sup>†,‡</sup> Colleen M. Niswender,<sup>†,‡,⊥</sup> P. Jeffrey Conn,<sup>†,‡,⊥</sup> Craig W. Lindsley,<sup>†,‡,§,||</sup> Aaron M. Bender<sup>†,‡,\*</sup>

\*Corresponding Author Email: [aaron.bender@vanderbilt.edu](mailto:aaron.bender@vanderbilt.edu)

<sup>†</sup>Warren Center for Neuroscience Drug Discovery, <sup>‡</sup>Department of Pharmacology, <sup>§</sup>Department of Chemistry, <sup>||</sup>Department of Biochemistry, and <sup>⊥</sup>Vanderbilt Kennedy Center, School of Medicine, Vanderbilt University, Nashville, Tennessee 37232, United States

#### TABLE OF CONTENTS

|                                                            |     |
|------------------------------------------------------------|-----|
| General Synthetic Methods                                  | S2  |
| General Synthetic Procedures and Compound Characterization | S2  |
| Procedures and References for DMPK Studies                 | S13 |
| Molecular Pharmacology and Radioligand Binding             | S19 |
| Ancillary Pharmacology                                     | S20 |
| Haloperidol-Induced Catalepsy and References               | S22 |

## **General Methods**

All reactions were carried out employing standard chemical techniques under inert atmosphere. Solvents used for extraction, washing, and chromatography were HPLC grade. All reagents were purchased from commercial sources and were used without further purification. Low resolution mass spectra were obtained on an Agilent 6120 or 6150 with UV detection at 215 nm and 254 nm along with ELSD detection and electrospray ionization, with all final compounds showing >95% purity and a parent mass ion consistent with the desired structure. All NMR spectra were recorded on a 400 MHz Brüker AV-400 instrument. <sup>1</sup>H chemical shifts are reported as δ values in ppm relative to the residual solvent peak (CDCl<sub>3</sub> = 7.26, MeOD = 3.34). Data are reported as follows: chemical shift, multiplicity (br = broad, s = singlet, d = doublet, t = triplet, q = quartet, p = pentet, dd = doublet of doublets, ddd = doublet of doublet of doublets, td = triplet of doublets, dt = doublet of triplets, m = multiplet), coupling constant, and integration. <sup>13</sup>C chemical shifts are reported as δ values in ppm relative to the residual solvent peak (CDCl<sub>3</sub> = 77.16, MeOD = 49.86). Automated flash column chromatography was performed on a Biotage Isolera 1 and a Teledyne ISCO Combi-Flash system. Microwave synthesis was performed in a Biotage Initiator microwave synthesis reactor. RP-HPLC purification of final compounds was performed on a Gilson preparative LC system. High resolution mass spectra were obtained on an Agilent 6540 UHD Q-TOF with ESI source. Melting points were recorded on an OptiMelt automated melting point system by Stanford Research Systems.

## **General Procedure A**

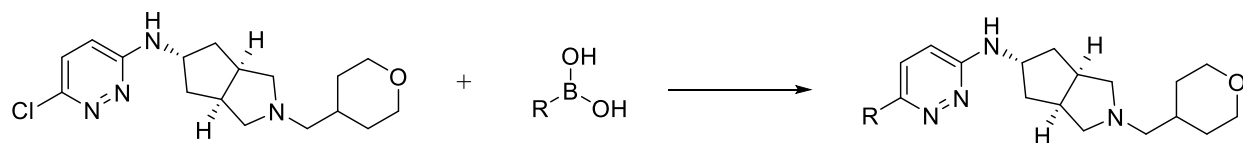

(3aR,5s,6aS)-N-(6-chloropyridazin-3-yl)-2-((tetrahydro-2H-pyran-4-yl)methyl)octahydrocyclopenta[c]pyrrol-5-amine (1 eq), boronic acid (1.5 eq), potassium carbonate (3 eq), and BrettPhos-Pd-G3 (0.1 eq) were sealed in a vial and placed under an inert atmosphere. 5:1 1,4-dioxane/H<sub>2</sub>O solution (degassed under vacuum) was added via syringe and the reaction mixture was stirred at 100 °C for 2 h or until complete by LCMS. The reaction mixture was cooled, diluted with H<sub>2</sub>O and extracted in DCM. Solvents were concentrated and the crude residue was purified by RP-HPLC. Fractions containing product were basified with sat. NaHCO<sub>3</sub> solution (if purified under acidic conditions), and extracted with DCM. Combined organic extracts were filtered through a phase separator and concentrated to give the final products.

**(3aR,5s,6aS)-N-(6-phenylpyridazin-3-yl)-2-((tetrahydro-2H-pyran-4-yl)methyl)octahydrocyclopenta[c]pyrrol-5-amine (8a)**

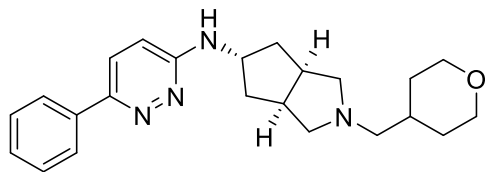

Followed General Procedure A with (3aR,5s,6aS)-N-(6-chloropyridazin-3-yl)-2-((tetrahydro-2H-pyran-4-yl)methyl)octahydrocyclopenta[c]pyrrol-5-amine **7<sup>1</sup>** (40 mg, 0.12 mmol), phenylboronic acid (21.7 mg, 0.18 mmol), potassium carbonate (50 mg, 0.36 mmol), and BrettPhos-Pd-G3 (10.8 mg, 0.01 mmol) to give the title compound as a white solid after purification by RP-HPLC (5-40% MeCN in 0.1% TFA solution over 10 min) (4.4 mg, 10%). <sup>1</sup>H NMR (400 MHz, CDCl<sub>3</sub>) δ 8.01 – 7.92 (m, 2H), 7.60 (d, *J* = 9.3 Hz, 1H), 7.50 – 7.41 (m, 2H), 7.41 – 7.34 (m, 1H), 6.70 (d, *J* = 9.3 Hz, 1H), 4.77 (d, *J* = 7.3 Hz, 1H), 4.45 – 4.34 (m, 1H), 3.97 (dd, *J* = 11.3, 4.0 Hz, 2H), 3.39 (td, *J* = 11.8, 1.9 Hz, 2H), 2.77 – 2.70 (m, 2H), 2.63 – 2.54 (m, 2H), 2.33 (dd, *J* = 9.2, 3.3 Hz, 2H), 2.26 (d, *J* = 6.7 Hz, 2H), 2.01 – 1.93 (m, 2H), 1.76 – 1.64 (m, 5H), 1.34 – 1.23 (m, 2H). <sup>13</sup>C NMR (101 MHz, CDCl<sub>3</sub>) δ 158.4, 151.4, 137.2, 128.9, 128.7, 126.0, 125.6, 113.3, 68.1, 62.3, 62.2, 53.3, 40.3, 39.8, 34.4, 32.0. HRMS (TOF, ES<sup>+</sup>), C<sub>23</sub>H<sub>31</sub>N<sub>4</sub>O [M+H]<sup>+</sup> calc. mass 379.2492, found 379.2487. m.p.= 195 – 198 °C.

**(3aR,5s,6aS)-N-(6-(pyridin-3-yl)pyridazin-3-yl)-2-((tetrahydro-2H-pyran-4-yl)methyl)octahydrocyclopenta[c]pyrrol-5-amine (8b)**

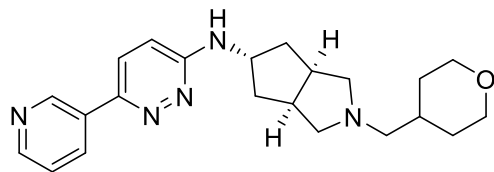

Followed General Procedure A with (3aR,5s,6aS)-N-(6-chloropyridazin-3-yl)-2-((tetrahydro-2H-pyran-4-yl)methyl)octahydrocyclopenta[c]pyrrol-5-amine (40 mg, 0.12 mmol), pyridine-3-boronic acid pinacol ester (36.5 mg, 0.18 mmol), potassium carbonate (50 mg, 0.36 mmol), and BrettPhos-Pd-G3 (10.8 mg, 0.01 mmol) to give the title compound as a white solid after purification by RP-HPLC (2-38% MeCN in 0.1% TFA solution over 9 min) (12.7 mg, 28%). <sup>1</sup>H NMR (400 MHz, CDCl<sub>3</sub>) δ 9.11 (d, *J* = 2.3 Hz, 1H), 8.61 (dd, *J* = 4.8, 1.7 Hz, 1H), 8.34 (dt, *J* = 8.0, 2.0 Hz, 1H), 7.61 (d, *J* = 9.3 Hz, 1H), 7.38 (dd, *J* = 8.0, 4.7 Hz, 1H), 6.72 (d, *J* = 9.3 Hz, 1H), 5.01 (d, *J* = 7.2 Hz, 1H), 4.45 – 4.35 (m, 1H), 3.95 (dd, *J* = 11.5, 3.8 Hz, 2H), 3.38 (td, *J* = 11.8, 1.9 Hz, 2H), 2.76 – 2.68 (m, 2H), 2.61 – 2.53 (m, 2H), 2.33 (dd, *J* = 9.2, 3.3 Hz, 2H), 2.25 (d, *J* = 6.7 Hz, 2H), 2.00 – 1.93 (m, 2H), 1.77 – 1.64 (m, 5H), 1.34 – 1.20 (m, 2H). <sup>13</sup>C NMR (101 MHz, CDCl<sub>3</sub>) δ 158.7, 149.7, 148.8, 147.2, 133.3, 132.9, 125.3, 123.8, 113.3, 68.1, 62.3, 62.1, 53.3, 40.3, 39.8, 34.4, 31.9. HRMS (TOF, ES<sup>+</sup>), C<sub>22</sub>H<sub>30</sub>N<sub>5</sub>O [M+H]<sup>+</sup> calc. mass 380.2445, found 380.2444. m.p.= 146 – 151 °C.

**N-(4-(6-(((3aR,5s,6aS)-2-((tetrahydro-2H-pyran-4-yl)methyl)octahydrocyclopenta[c]pyrrol-5-yl)amino)pyridazin-3-yl)phenyl)acetamide (8c)**

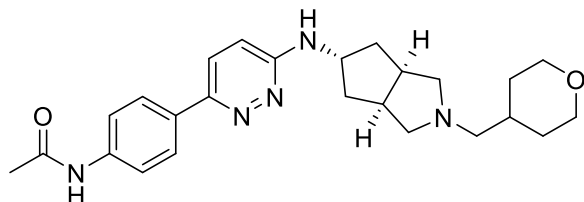

Followed General Procedure A with (3aR,5s,6aS)-N-(6-chloropyridazin-3-yl)-2-((tetrahydro-2H-pyran-4-yl)methyl)octahydrocyclopenta[c]pyrrol-5-amine (20 mg, 0.06 mmol), 4-acetylaminophenyl boronic acid (16 mg, 0.09 mmol), potassium carbonate (25 mg, 0.18 mmol), and BrettPhos-Pd-G3 (5.4 mg, 0.006 mmol) to give the title compound as a white solid after purification by RP-HPLC (1-30% MeCN in 0.1% TFA solution over 9 min) (7.3 mg, 28%). <sup>1</sup>H NMR (400 MHz, CDCl<sub>3</sub>) δ 7.88 (d, *J* = 8.6 Hz, 2H), 7.80 (s, 1H), 7.61 (d, *J* = 8.6 Hz, 2H), 7.55 (d, *J* = 9.3 Hz, 1H), 6.72 (d, *J* = 9.4 Hz, 1H), 4.88 (d, *J* = 7.3 Hz, 1H), 4.48 – 4.38 (m, 1H), 3.96 (dd, *J* = 11.4, 3.3 Hz, 2H), 3.38 (td, *J* = 11.8, 1.9 Hz, 2H), 2.83 – 2.73 (m, 4H), 2.39 – 2.30 (m, 4H), 2.19 (s, 3H), 1.98 (dd, *J* = 12.9, 5.8 Hz, 2H), 1.79 – 1.66 (m, 5H), 1.35 – 1.23 (m, 2H). <sup>13</sup>C NMR (101 MHz, CDCl<sub>3</sub>) δ 168.7, 158.1, 151.0, 138.7, 132.8, 126.6, 125.4, 120.1, 114.0, 68.0, 62.1, 61.9, 53.0, 40.1, 39.3, 34.1, 31.9, 24.8. HRMS (TOF, ES+), C<sub>25</sub>H<sub>34</sub>N<sub>5</sub>O<sub>2</sub> [M+H]<sup>+</sup> calc. mass 436.2707, found 436.2706. m.p.= 229 – 234 °C.

**2-methyl-5-(6-(((3aR,5s,6aS)-2-((tetrahydro-2H-pyran-4-yl)methyl)octahydrocyclopenta[c]pyrrol-5-yl)amino)pyridazin-3-yl)isoindolin-1-one (8d)**

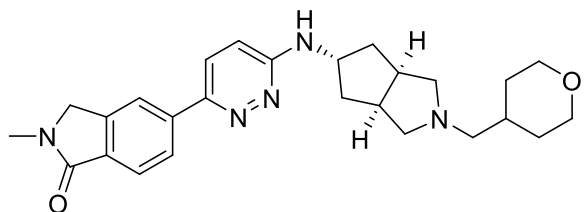

Followed General Procedure A with (3aR,5s,6aS)-N-(6-chloropyridazin-3-yl)-2-((tetrahydro-2H-pyran-4-yl)methyl)octahydrocyclopenta[c]pyrrol-5-amine (40 mg, 0.12 mmol), 2-methyl-1-isoindolinone-5 boronic acid (34.0 mg, 0.18 mmol), potassium carbonate (50 mg, 0.36 mmol), and BrettPhos-Pd-G3 (10.8 mg, 0.01 mmol) to give the title compound as a yellow solid after purification by RP-HPLC (2-38% MeCN in 0.1% TFA solution over 9 min) (9.6 mg, 18%). <sup>1</sup>H NMR (400 MHz, MeOD) δ 8.10 (s, 1H), 8.03 (dd, *J* = 8.0, 1.5 Hz, 1H), 7.81 (dd, *J* = 10.2, 8.3 Hz, 2H), 6.94 (d, *J* = 9.4 Hz, 1H), 4.56 (s, 2H), 4.55 – 4.47 (m, 1H), 3.94 (dd, *J* = 11.3, 3.4 Hz, 2H), 3.43 (td, *J* = 11.9, 1.9 Hz, 2H), 3.22 (s, 3H), 2.84 – 2.74 (m, 4H), 2.32 (d, *J* = 6.8 Hz, 2H), 2.28 – 2.22 (m, 2H), 2.00 – 1.92 (m, 2H), 1.80 – 1.70 (m, 5H), 1.33 – 1.21 (m, 2H). <sup>13</sup>C NMR (101 MHz, MeOD) δ 169.9, 159.1, 150.6, 143.3, 141.2, 132.9, 126.8, 126.3, 123.8, 120.9, 116.8, 68.3, 62.9, 62.3, 52.8, 52.7, 40.9, 38.7, 34.7, 32.3, 29.1, HRMS (TOF, ES+), C<sub>26</sub>H<sub>34</sub>N<sub>5</sub>O<sub>2</sub> [M+H]<sup>+</sup> calc. mass 448.2707, found 448.2703. m.p.= 166 – 174 °C.

**(3aR,5s,6aS)-N-(6-(2-fluorophenyl)pyridazin-3-yl)-2-((tetrahydro-2H-pyran-4-yl)methyl)octahydrocyclopenta[c]pyrrol-5-amine (8e)**

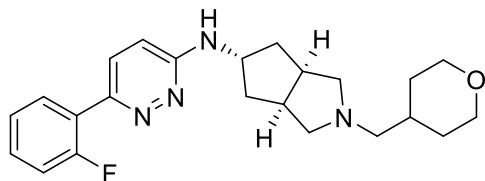

Followed General Procedure A with (3aR,5s,6aS)-N-(6-chloropyridazin-3-yl)-2-((tetrahydro-2H-pyran-4-yl)methyl)octahydrocyclopenta[c]pyrrol-5-amine (40 mg, 0.12 mmol), 2-fluorophenyl boronic acid (24.9 mg, 0.18 mmol), potassium carbonate (50 mg, 0.36 mmol), and BrettPhos-Pd-G3 (10.8 mg, 0.01 mmol) to give the title compound as a white solid after purification by RP-HPLC (2-38% MeCN in 0.1% TFA solution over 9 min) (21.9 mg, 47%). <sup>1</sup>H NMR (400 MHz, CDCl<sub>3</sub>) δ 8.05 (t, *J* = 8.0 Hz, 1H), 7.65 (dd, *J* = 9.3, 1.8 Hz, 1H), 7.37 – 7.29 (m, 1H), 7.26 – 7.20 (m, 1H), 7.12 (dd, *J* = 11.6, 8.1 Hz, 1H), 6.69 (d, *J* = 9.3 Hz, 1H), 5.07 (d, *J* = 7.2 Hz, 1H), 4.45 – 4.35 (m, 1H), 3.95 (dd, *J* = 11.5, 4.4 Hz, 2H), 3.37 (td, *J* = 11.6 Hz, 1.6 Hz, 2H), 2.81 – 2.68 (m, 4H), 2.38 – 2.28 (m, 4H), 2.00 – 1.94 (m, 2H), 1.76 – 1.63 (m, 5H), 1.34 – 1.21 (m, 2H). <sup>13</sup>C NMR (101 MHz, CDCl<sub>3</sub>) δ 160.3 (d, *J* = 248.5 Hz), 158.2 (d, *J* = 5.1 Hz), 148.0 (d, *J* = 1.7 Hz), 130.3 – 130.2 (m, 2C), 128.9 (d, *J* = 9.4 Hz), 125.2 (d, *J* = 11.5 Hz), 124.7 (d, *J* = 3.3 Hz), 116.1 (d, *J* = 22.6 Hz), 112.7, 67.9, 62.0, 61.9, 52.9, 40.1, 39.3, 34.2, 31.8. HRMS (TOF, ES+), C<sub>23</sub>H<sub>30</sub>FN<sub>4</sub>O [M+H]<sup>+</sup> calc. mass 397.2398, found 397.2393. m.p. = 154 – 158 °C.

**(3aR,5s,6aS)-N-(6-(3-fluorophenyl)pyridazin-3-yl)-2-((tetrahydro-2H-pyran-4-yl)methyl)octahydrocyclopenta[c]pyrrol-5-amine (8f)**

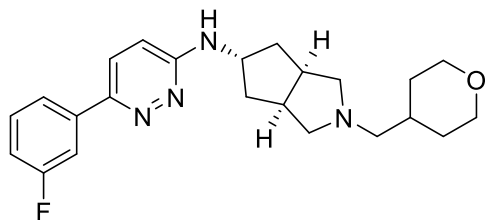

Followed General Procedure A with (3aR,5s,6aS)-N-(6-chloropyridazin-3-yl)-2-((tetrahydro-2H-pyran-4-yl)methyl)octahydrocyclopenta[c]pyrrol-5-amine (40 mg, 0.12 mmol), 3-fluorophenyl boronic acid (24.9 mg, 0.18 mmol), potassium carbonate (50 mg, 0.36 mmol), and BrettPhos-Pd-G3 (10.8 mg, 0.01 mmol) to give the title compound as a white solid after purification by RP-HPLC (2-38% MeCN in 0.1% TFA solution over 9 min) (10.2 mg, 22%). <sup>1</sup>H NMR (400 MHz, CDCl<sub>3</sub>) δ 7.77 – 7.69 (m, 2H), 7.58 (d, *J* = 9.3 Hz, 1H), 7.44 – 7.38 (m, 1H), 7.11 – 7.04 (m, 1H), 6.70 (d, *J* = 9.3 Hz, 1H), 4.82 (d, *J* = 7.3 Hz, 1H), 4.46 – 4.36 (m, 1H), 3.97 (dd, *J* = 11.3, 4.7, 2H), 3.39 (td, *J* = 11.9, 1.9 Hz, 2H), 2.82 – 2.70 (m, 2H), 2.68 – 2.54 (m, 2H), 2.39 – 2.31 (m, 2H), 2.32 – 2.24 (m, 2H), 2.03 – 1.94 (m, 2H), 1.79 – 1.67 (m, 5H), 1.37 – 1.22 (m, 2H). <sup>13</sup>C NMR (101 MHz, CDCl<sub>3</sub>) δ 163.5 (d, *J* = 246.7 Hz), 158.5, 150.2 (d, *J* = 2.2 Hz), 139.4 (d, *J* = 7.9 Hz), 130.4 (d, *J* = 8.4 Hz), 125.5, 121.4 (d, *J* = 3.0 Hz), 115.5 (d, *J* = 21.4 Hz), 113.3, 112.9 (d, *J* = 22.9 Hz), 68.1, 62.3, 62.1, 53.3, 40.3, 39.7, 34.4, 32.0. HRMS (TOF, ES+), C<sub>23</sub>H<sub>30</sub>FN<sub>4</sub>O [M+H]<sup>+</sup> calc. mass 397.2398, found 397.2393. m.p. = 196 – 199 °C.

**(3aR,5s,6aS)-N-(6-(4-fluorophenyl)pyridazin-3-yl)-2-((tetrahydro-2H-pyran-4-yl)methyl)octahydrocyclopenta[c]pyrrol-5-amine (8g)**

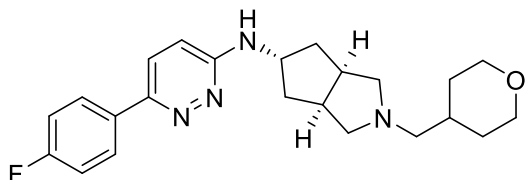

Followed General Procedure A with (3aR,5s,6aS)-N-(6-chloropyridazin-3-yl)-2-((tetrahydro-2H-pyran-4-yl)methyl)octahydrocyclopenta[c]pyrrol-5-amine (40 mg, 0.12 mmol), 4-fluorophenyl boronic acid (24.9 mg, 0.18 mmol), potassium carbonate (50 mg, 0.36 mmol), and BrettPhos-Pd-G3 (10.8 mg, 0.01 mmol) to give the title compound as a white solid after purification by RP-HPLC (2-38% MeCN in 0.1% TFA solution over 9 min) (5.3 mg, 11%). <sup>1</sup>H NMR (400 MHz, CDCl<sub>3</sub>) δ 7.96 – 7.90 (m, 2H), 7.55 (d, *J* = 9.3 Hz, 1H), 7.17 – 7.10 (m, 2H), 6.70 (d, *J* = 9.3 Hz, 1H), 4.78 (d, *J* = 7.3 Hz, 1H), 4.45 – 4.36 (m, 1H), 3.97 (dd, *J* = 11.4, 4.1 Hz, 2H), 3.39 (td, *J* = 11.8, 1.9 Hz, 2H), 2.80 – 2.69 (m, 2H), 2.67 – 2.57 (m, 2H), 2.34 (dd, *J* = 9.4, 3.4 Hz, 2H), 2.28 (d, *J* = 6.8 Hz, 2H), 2.02 – 1.94 (m, 2H), 1.76 – 1.65 (m, 5H), 1.35 – 1.22 (m, 2H). <sup>13</sup>C NMR (101 MHz, CDCl<sub>3</sub>) δ 163.4 (d, *J* = 248.4 Hz), 158.3, 150.6, 133.3 (d, *J* = 3.2 Hz), 127.8 (d, *J* = 8.3 Hz), 125.4, 115.9 (d, *J* = 21.5 Hz), 113.6, 68.1, 62.3, 62.1, 53.3, 40.3, 39.7, 34.4, 32.0. HRMS (TOF, ES+), C<sub>23</sub>H<sub>30</sub>FN<sub>4</sub>O [M+H]<sup>+</sup> calc. mass 397.2398, found 397.2394. m.p.= 170 – 173 °C.

**(3aR,5s,6aS)-N-(6-(2,5-difluorophenyl)pyridazin-3-yl)-2-((tetrahydro-2H-pyran-4-yl)methyl)octahydrocyclopenta[c]pyrrol-5-amine (8h)**

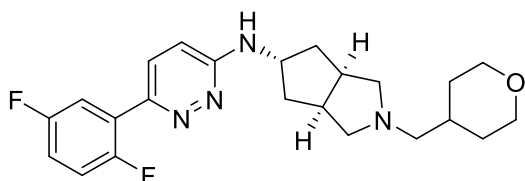

Followed General Procedure A with (3aR,5s,6aS)-N-(6-chloropyridazin-3-yl)-2-((tetrahydro-2H-pyran-4-yl)methyl)octahydrocyclopenta[c]pyrrol-5-amine (50 mg, 0.15 mmol), 2,5-difluorophenyl boronic acid (35.2 mg, 0.22 mmol), potassium carbonate (62 mg, 0.45 mmol), and BrettPhos-Pd-G3 (13.5 mg, 0.015 mmol) to give the title compound as a white solid after purification by RP-HPLC (5-40% MeCN in 0.1% TFA solution over 9 min) (17.8 mg, 29%). <sup>1</sup>H NMR (400 MHz, CDCl<sub>3</sub>) δ 7.88 – 7.82 (m, 1H), 7.71 – 7.67 (m, 1H), 7.12 – 6.98 (m, 2H), 6.68 (d, *J* = 9.4 Hz, 1H), 5.11 – 4.99 (m, 1H), 4.43 – 4.34 (m, 1H), 3.96 (dd, *J* = 11.3, 4.3 Hz, 2H), 3.38 (td, *J* = 11.7, 1.6 Hz, 2H), 2.81 – 2.73 (m, 2H), 2.67 – 2.59 (m, 2H), 2.38 – 2.32 (m, 2H), 2.28 (d, *J* = 6.7 Hz, 2H), 2.01 – 1.93 (m, 2H), 1.78 – 1.66 (m, 5H), 1.36 – 1.19 (m, 2H). <sup>13</sup>C NMR (101 MHz, CDCl<sub>3</sub>) δ 159.2 (dd, *J* = 242.0, 2.1 Hz), 158.5, 156.4 (dd, *J* = 244.1, 2.3 Hz), 146.9, 128.7 (d, *J* = 10.9 Hz), 126.6 (dd, *J* = 13.2, 8.2 Hz), 117.3 (dd, *J* = 25.0, 8.5 Hz), 116.6 (dd, *J* = 26.7, 9.5 Hz), 116.3 (dd, *J* = 25.6, 3.4), 112.3, 68.0, 62.2, 62.1, 53.2, 40.3, 39.7, 34.3, 31.9. HRMS (TOF, ES+), C<sub>23</sub>H<sub>29</sub>F<sub>2</sub>N<sub>4</sub>O [M+H]<sup>+</sup> calc. mass 415.2304, found 415.2302. m.p.= 182 – 184 °C.

**(3aR,5s,6aS)-2-((tetrahydro-2H-pyran-4-yl)methyl)-N-(6-(2,3,5-trifluorophenyl)pyridazin-3-yl)octahydrocyclopenta[c]pyrrol-5-amine (8i)**

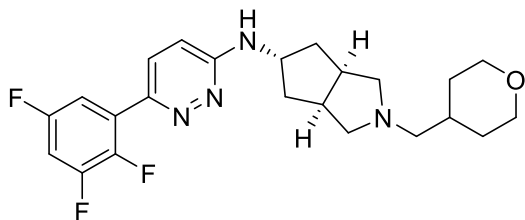

Followed General Procedure A with (3aR,5s,6aS)-N-(6-chloropyridazin-3-yl)-2-((tetrahydro-2H-pyran-4-yl)methyl)octahydrocyclopenta[c]pyrrol-5-amine (40 mg, 0.12 mmol), 2,3,5-trifluorophenyl boronic acid (27.2 mg, 0.15 mmol), potassium carbonate (50 mg, 0.36 mmol), and BrettPhos-Pd-G3 (10.8 mg, 0.01 mmol) to give the title compound as a white solid after purification by RP-HPLC (10-40% MeCN in 0.1% TFA solution over 9 min) (5.4 mg, 11%). <sup>1</sup>H NMR (400 MHz, CDCl<sub>3</sub>) δ 7.68 (dd, *J* = 9.4, 2.1 Hz, 1H), 7.66 – 7.62 (m, 1H), 6.97 – 6.90 (m, 1H), 6.71 (d, *J* = 9.4 Hz, 1H), 5.17 (d, *J* = 7.2 Hz, 1H), 4.47 – 4.37 (m, 1H), 4.96 (dd, *J* = 11.4, 3.9 Hz, 2H), 3.38 (td, *J* = 11.8, 1.9 Hz, 2H), 2.85 – 2.77 (m, 2H), 2.77 – 2.67 (m, 2H), 2.43 – 2.36 (m, 2H), 2.34 (d, *J* = 6.0 Hz, 2H), 2.04 – 1.95 (m, 2H), 1.80 – 1.67 (m, 5H), 1.36 – 1.23 (m, 2H). <sup>13</sup>C NMR (101 MHz, CDCl<sub>3</sub>) δ 158.6, 157.9 (ddd, *J* = 244.3, 10.9, 3.0 Hz), 150.9 (ddd, *J* = 249.9, 16.9, 13.1 Hz), 145.3 (ddd, *J* = 245.8, 13.8, 3.9 Hz), 146.2 – 146.0 (m, 1C), 128.6 (d, *J* = 10.6 Hz), 127.8 (t, *J* = 9.9 Hz), 112.5, 111.0 – 110.6 (m, 1C), 105.4 (dd, *J* = 26.7, 21.0 Hz), 68.0, 62.1, 62.0, 53.1, 40.2, 39.4, 34.2, 31.9. HRMS (TOF, ES+), C<sub>23</sub>H<sub>28</sub>F<sub>3</sub>N<sub>4</sub>O [M+H]<sup>+</sup> calc. mass 433.2210, found 433.2207. m.p. = 201 – 203 °C.

**General Procedure B**

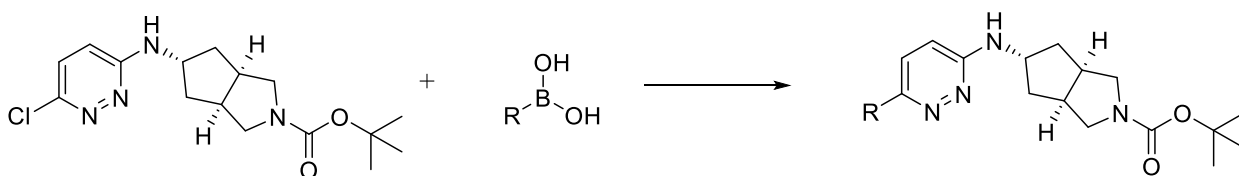

(3aR,5s,6aS)-N-(6-chloropyridazin-3-yl)-2-((tetrahydro-2H-pyran-4-yl)methyl)octahydrocyclopenta[c]pyrrol-5-amine (1 eq), boronic acid (1.5 eq), potassium carbonate (3 eq), and BrettPhos-Pd-G3 (0.1 eq) were sealed in a vial and placed under an inert atmosphere. 5:1 1,4-dioxane/H<sub>2</sub>O solution (degassed) was added via syringe and the reaction stirred at 100 °C for 2 h. The reaction was cooled, diluted with H<sub>2</sub>O and extracted in DCM. Solvents were concentrated and the crude residue was purified by column chromatography (EtOAc in hexanes) to yield the title compound.

**tert-butyl (3aR,5s,6aS)-5-((6-(2-chloro-5-fluorophenyl)pyridazin-3-yl)amino)hexahydrocyclopenta[c]pyrrole-2(1H)-carboxylate (9a)**

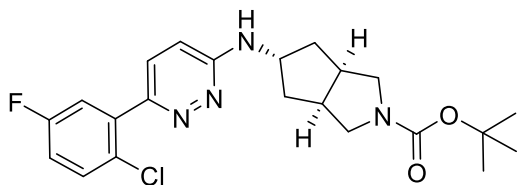

Followed General Procedure B with (3aR,5s,6aS)-N-(6-chloropyridazin-3-yl)-2-((tetrahydro-2H-pyran-4-yl)methyl)octahydrocyclopenta[c]pyrrol-5-amine (500 mg, 1.5 mmol), 2-chloro-5-fluorophenyl boronic acid (309 mg, 1.77 mmol), potassium carbonate (621 mg, 4.4 mmol), and BrettPhos-Pd-G3 (134 mg, 0.15 mmol) to give the title compound as a white solid after purification by column chromatography (3-80% EtOAc in hexanes) (422 mg, 66%). <sup>1</sup>H NMR (400 MHz, CDCl<sub>3</sub>) δ 7.62 (d, *J* = 9.3 Hz, 1H), 7.47 (dd, *J* = 9.1, 3.1 Hz, 1H), 7.40 (dd, *J* = 8.8, 5.0 Hz, 1H), 7.07 – 7.01 (m, 1H), 6.69 (d, *J* = 9.3 Hz, 1H), 5.33 (d, *J* = 6.7 Hz, 1H), 4.43 – 4.34 (m, 1H), 3.62 – 3.52 (m, 2H), 3.21 (d, *J* = 11.3 Hz, 2H), 2.90 – 2.80 (m, 2H), 2.09 – 2.00 (m, 2H), 1.94 – 1.85 (m, 2H), 1.46 (s, 9H). <sup>13</sup>C NMR (101 MHz, CDCl<sub>3</sub>) δ 161.5, (d, *J* = 247.2 Hz), 158.2, 154.7, 150.3, 138.3 (d, *J* = 8.1 Hz), 131.5 (d, *J* = 8.5 Hz), 129.3, 127.1 (d, *J* = 3.2 Hz), 118.4 (d, *J* = 24.1 Hz), 116.8 (d, *J* = 22.6 Hz), 111.8, 79.5, 53.2, 52.3, 41.9 – 40.3 (m, 2C), 39.37, 29.81, 28.63. HRMS (TOF, ES<sup>+</sup>), C<sub>22</sub>H<sub>27</sub>ClFN<sub>4</sub>O<sub>2</sub> [M+H]<sup>+</sup> calc. mass 433.1801, found 433.1797. m.p.= 182 – 185 °C.

**tert-butyl (3aR,5s,6aS)-5-((6-(2,3,5-trifluorophenyl)pyridazin-3-yl)amino)hexahydrocyclopenta[c]pyrrole-2(1H)-carboxylate (9b)**

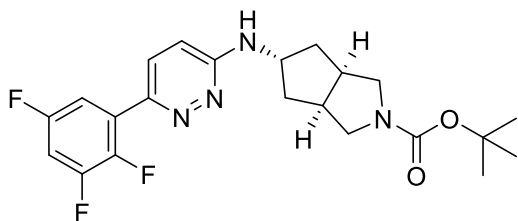

Followed General Procedure B with (3aR,5s,6aS)-N-(6-chloropyridazin-3-yl)-2-((tetrahydro-2H-pyran-4-yl)methyl)octahydrocyclopenta[c]pyrrol-5-amine (80 mg, 0.24 mmol), 2,3,5-trifluorophenyl boronic acid (49.8 mg, 0.28 mmol), potassium carbonate (99 mg, 0.71 mmol), and BrettPhos-Pd-G3 (21.4 mg, 0.024 mmol) to give the title compound as a white solid after purification by column chromatography (3-80% EtOAc in hexanes) (55.7 mg, 54%). <sup>1</sup>H NMR (400 MHz, CDCl<sub>3</sub>) δ 7.69 (dd, *J* = 9.4, 1.8 Hz, 2 1H), 7.66 – 7.61 (m, 1H), 6.97 – 6.89 (m, 1H), 6.70 (d, *J* = 9.4 Hz, 1H), 5.51 (d, *J* = 6.8 Hz, 1H), 4.45 – 4.36 (m, 1H), 3.62 – 3.51 (m, 2H), 3.21 (d, *J* = 11.1 Hz, 2H), 2.91 – 2.81 (m, 2H), 2.10 – 2.00 (m, 2H), 1.95 – 1.86 (m, 2H), 1.46 (s, 9H). <sup>13</sup>C NMR (101 MHz, CDCl<sub>3</sub>) δ 157.9, (ddd, *J* = 245.6, 11.7, 2.9 Hz), 158.4, 154.7, 150.9 (ddd, *J* = 249.7, 15.1 13.0, Hz), 145.3, (ddd, *J* = 247.6, 13.6, 4.3 Hz), 146.2 – 146.1 (m, 1C), 128.6 (d, *J* = 10.6 Hz), 127.8 (t, *J* = 9.9 Hz), 112.4, 111.0 – 110.6 (m, 1C), 105.4 (dd, *J* = 27.9, 20.9 Hz), 79.5,



53.1, 52.3, 41.9 – 40.2 (m, 2C), 39.3, 28.3. HRMS (TOF, ES+), C<sub>22</sub>H<sub>26</sub>F<sub>3</sub>N<sub>4</sub>O<sub>2</sub> [M+H]<sup>+</sup> calc. mass 435.2002, found 435.2001. m.p.= 180 – 183 °C.

### General Procedure C

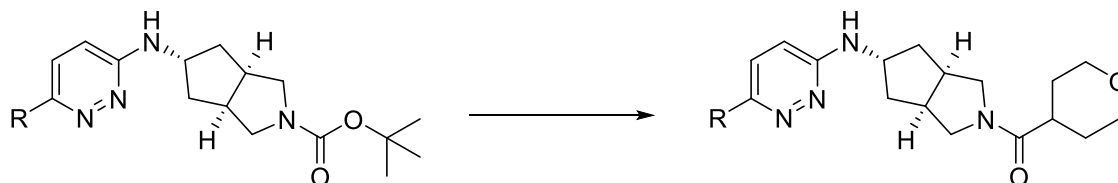

To a solution of Boc-protected intermediate compound in 1,4 dioxane was added 4M HCl solution in dioxane. After 1.5 h or completion by LCMS, the reaction was concentrated to yield the HCl salt. The resulting HCl salt (1 eq) was suspended in DMF and DIPEA (3 eq) was added, followed by the addition of tetrahydro-2H-pyran-4-carboxylic acid (1.2 eq) and HATU (1.5 eq) After stirring at r.t. for 1 h or until completion by LCMS, the reaction mixture was purified directly by RP-HPLC. Fractions containing product were basified with sat. NaHCO<sub>3</sub> solution (if purified under acidic conditions), and extracted with DCM. Combined organic extracts were filtered through a phase separator and concentrated to give the final products.

### **((3aR,5s,6aS)-5-((6-(2-chloro-5-fluorophenyl)pyridazin-3-yl)amino)hexahydrocyclopenta[c]pyrrol-2(1H)-yl)(tetrahydro-2H-pyran-4-yl)methanone (10a)**

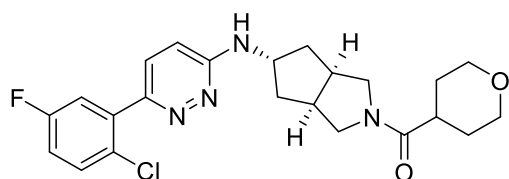

Followed General Procedure C: tert-butyl (3aR,5s,6aS)-5-((6-(2-chloro-5-fluorophenyl)pyridazin-3-yl)amino)hexahydrocyclopenta[c]pyrrole-2(1H)-carboxylate (420 mg, 0.97 mmol), in 1,4 dioxane (5 mL) was added 4M HCl solution in dioxanes (5 mL). After 1.5 h the reaction was concentrated to yield the HCl salt as a white solid (360 mg, 100%). The resulting HCl salt (360 mg, 0.97 mmol) was suspended in DMF (5 mL) and DIPEA (0.51 mL, 2.9 mmol) followed with the addition of tetrahydro-2H-pyran-4-carboxylic acid (150 mg, 0.12 mmol) and HATU (560 mg, 1.5 mmol). After 1 h at r.t., the crude was purified by RP-HPLC (30-70% MeCN in 0.1% TFA solution over 20 min) to yield the title compound as a white solid (380 mg, 88% over 2 steps). <sup>1</sup>H NMR (400 MHz, CDCl<sub>3</sub>) δ 7.62 (d, *J* = 9.3 Hz, 1H), 7.45 (dd, *J* = 9.2, 3.1 Hz, 1H), 7.40 (dd, *J* = 8.7, 5.1 Hz, 1H), 7.07 – 7.01 (m, 1H), 6.69 (d, *J* = 9.3 Hz, 1H), 5.46 (d, *J* = 6.6 Hz, 1H), 4.48 – 4.39 (m, 1H), 4.06 – 3.98 (m, 2H), 3.77 – 3.69 (m, 2H), 3.48 – 3.34 (m, 4H), 3.05 – 2.94 (m, 1H), 2.92 –

2.82 (m, 1H), 2.59 (tt,  $J = 11.4, 3.8$  Hz, 1H), 2.13 – 1.83 (m, 6H), 1.68 – 1.56 (m, 2H).  $^{13}\text{C}$  NMR (101 MHz,  $\text{CDCl}_3$ )  $\delta$  173.1, 161.5, (d,  $J = 247.3$  Hz), 158.0, 150.4 (d,  $J = 1.6$  Hz), 138.3 (d,  $J = 11.3$  Hz), 131.5 (d,  $J = 8.2$  Hz), 129.3, 127.1 (d,  $J = 3.4$  Hz), 118.3 (d,  $J = 24.0$  Hz), 116.9 (d,  $J = 22.6$  Hz), 112.2, 67.4, 67.4, 53.0, 52.4, 52.0, 42.1, 39.9, 39.8, 39.3, 39.2, 28.8, 28.6. HRMS (TOF, ES+),  $\text{C}_{23}\text{H}_{27}\text{ClFN}_4\text{O}_2$   $[\text{M}+\text{H}]^+$  calc. mass 445.1801, found 445.1799. A 1:1 ratio of amide rotamers is observed in  $^{13}\text{C}$  spectra. m.p.= 188 – 195 °C.

**(tetrahydro-2H-pyran-4-yl)((3aR,5s,6aS)-5-((6-(2,3,5-trifluorophenyl)pyridazin-3-yl)amino)hexahydrocyclopenta[c]pyrrol-2(1H)-yl)methanone (10b)**

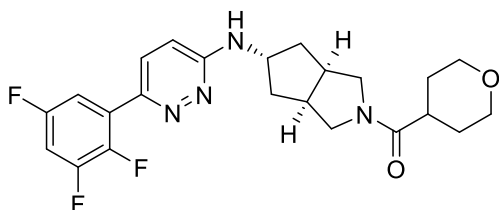

Followed General Procedure C: To tert-butyl (3aR,5s,6aS)-5-((6-(2-chloro-5-fluorophenyl)pyridazin-3-yl)amino)hexahydrocyclopenta[c]pyrrole-2(1H)-carboxylate (15 mg, 0.035 mmol), in MeOH (0.5 mL) was added 4M HCl solution in dioxanes (0.5 mL). After 30 min, the reaction was concentrated to yield the HCl salt as a white solid (12.8 mg, 100%). The resulting HCl salt (12.8 mg, 0.035 mmol) was suspended in DMF (1 mL) and DIPEA (30  $\mu\text{L}$ , 0.17 mmol) followed with the addition of tetrahydro-2H-pyran-4-carboxylic acid (6.7 mg, 0.052 mmol) and HATU (19.7 mg, 0.052 mmol). After 1 h at r.t., the crude was purified by RP-HPLC (30-70% MeCN in 0.05%  $\text{NH}_4\text{OH}$  solution in over 20 min) to yield the title compound as a white solid (12.1 mg, 78% over 2 steps).  $^1\text{H}$  NMR (400 MHz,  $\text{CDCl}_3$ )  $\delta$  7.70 (dd,  $J = 9.4, 2.1$  Hz, 1H), 7.68 – 7.62 (m, 1H), 6.99 – 6.91 (m, 1H), 6.71 (d,  $J = 9.4$  Hz, 1H), 5.34 (d,  $J = 6.6$  Hz, 1H), 4.52 – 4.43 (m, 1H), 4.07 – 3.99 (m, 2H), 3.79 – 3.71 (m, 2H), 3.49 – 3.36 (m, 4H), 3.05 – 2.95 (m, 1H), 2.94 – 2.84 (m, 1H), 2.60 (tt,  $J = 11.4, 3.8$  Hz, 1H), 2.15 – 2.03 (m, 2H), 2.00 – 1.85 (m, 4H), 1.68 – 1.58 (m, 2H).  $^{13}\text{C}$  NMR (101 MHz,  $\text{CDCl}_3$ )  $\delta$  173.1, 159.1 (ddd,  $J = 244.7, 10.8, 2.7$  Hz), 158.0, 150.9 (ddd,  $J = 250.5, 15.2, 13.0$  Hz), 145.4 (ddd,  $J = 246.8, 14.1, 3.9$  Hz), 146.5 – 146.3 (m, 1C), 128.7 (d,  $J = 10.6$  Hz), 127.6 (t,  $J = 9.9$  Hz), 113.0, 111.0 – 110.6 (m, 1C), 105.6 (dd,  $J = 27.2, 21.1$  Hz), 67.4, 67.4, 53.0, 52.4, 52.0, 42.2, 39.9, 39.8, 39.3, 39.2, 28.8, 28.7. HRMS (TOF, ES+),  $\text{C}_{23}\text{H}_{26}\text{F}_3\text{N}_4\text{O}_2$   $[\text{M}+\text{H}]^+$  calc. mass 447.2002, found 447.1999. A 1:1 ratio of amide rotamers is observed in  $^{13}\text{C}$  spectra. m.p.= 200 – 207 °C.

## General Procedure D

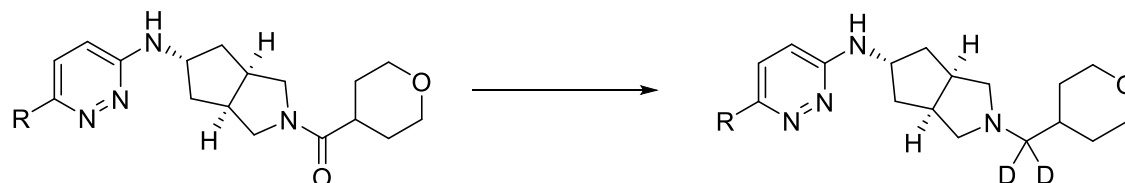

Amide intermediate (1 eq) was suspended in THF and cooled to 0 °C. Lithium aluminum deuteride (3 eq) was added and the reaction mixture was stirred at 0 °C for 30 min or until completion by LCMS. The mixture was quenched with H<sub>2</sub>O, and 1N NaOH aq. solution, and stirred for an additional 30 min. Solids were removed by filtration and solvents were concentrated. Crude residue was purified by RP-HPLC. Fractions containing product were basified with sat. NaHCO<sub>3</sub> solution (if purified under acidic conditions), and extracted with DCM. Combined organic extracts were filtered through a phase separator and concentrated to give the final products.

### (3aR,5s,6aS)-N-(6-(2-chloro-5-fluorophenyl)pyridazin-3-yl)-2-((tetrahydro-2H-pyran-4-yl)methyl-d<sub>2</sub>)octahydrocyclopenta[c]pyrrol-5-amine (11a)

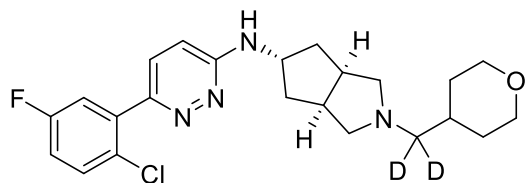

Followed General Procedure D with ((3aR,5s,6aS)-5-((6-(2-chloro-5-fluorophenyl)pyridazin-3-yl)amino)hexahydrocyclopenta[c]pyrrol-2(1H)-yl)(tetrahydro-2H-pyran-4-yl)methanone (33 mg, 0.074 mmol) in THF (1 mL) to give the title compound as a white solid after purification by RP-HPLC (5-35% MeCN in 0.1% TFA solution over 10 min) (8.1 mg, 25%). <sup>1</sup>H NMR (400 MHz, CDCl<sub>3</sub>) δ 7.61 (d, *J* = 9.3 Hz, 1H), 7.48 (dd, *J* = 9.2, 3.1 Hz, 1H), 7.41 (dd, *J* = 8.8, 5.1 Hz, 1H), 7.07 – 7.01 (m, 1H), 6.68 (d, *J* = 9.3 Hz, 1H), 4.97 (d, *J* = 7.2 Hz, 1H), 4.41 – 4.31 (m, 1H), 3.96 (dd, *J* = 11.3, 3.9 Hz, 2H), 3.38 (td, *J* = 11.8, 1.9 Hz, 2H), 2.78 – 2.70 (m, 2H), 2.62 – 2.52 (m, 2H), 2.34 (dd, *J* = 9.3, 3.1 Hz, 2H), 2.01 – 1.93 (m, 2H), 1.81 – 1.62 (m, 5H), 1.34 – 1.22 (m, 2H). <sup>13</sup>C NMR (101 MHz, CDCl<sub>3</sub>) δ 161.6, (d, *J* = 247 Hz), 158.5 (d, *J* = 5.5 Hz), 150.2 (d, *J* = 1.8 Hz), 138.5 (d, *J* = 8.2 Hz), 131.4 (d, *J* = 8.6 Hz), 129.2, 127.1 (d, *J* = 3.4 Hz), 118.4 (d, *J* = 24.0 Hz), 116.8 (d, *J* = 22.8 Hz), 111.5, 68.1, 62.1, 53.4, 53.3, 40.3, 39.8, 34.2, 31.9. HRMS (TOF, ES<sup>+</sup>), C<sub>23</sub>H<sub>27</sub>D<sub>2</sub>ClFN<sub>4</sub>O [M+H]<sup>+</sup> calc. mass 433.2134, found 433.2131. m.p. = 198 – 204 °C.

**(3aR,5s,6aS)-2-((tetrahydro-2H-pyran-4-yl)methyl-d2)-N-(6-(2,3,5-trifluorophenyl)pyridazin-3-yl)octahydrocyclopenta[c]pyrrol-5-amine (11b)**

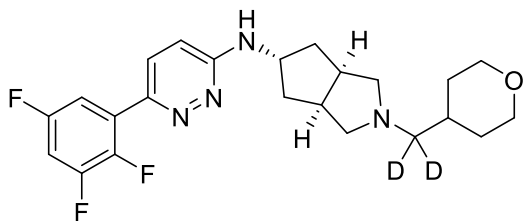

Followed General Procedure D with (tetrahydro-2H-pyran-4-yl)((3aR,5s,6aS)-5-((6-(2,3,5-trifluorophenyl)pyridazin-3-yl)amino)hexahydrocyclopenta[c]pyrrol-2(1H)-yl)methanone (37 mg, 0.083 mmol) in THF (1 mL) to give the title compound as a white solid after purification by RP-HPLC (5-35% MeCN in 0.1% TFA solution over 5 min) (5 mg, 14%).  $^1\text{H}$  NMR (400 MHz,  $\text{CDCl}_3$ )  $\delta$  7.68 (dd,  $J = 9.6, 2.1$  Hz, 1H), 7.67 – 7.63 (m, 1H), 6.98 – 6.90 (m, 1H), 6.71 (d,  $J = 9.4$  Hz, 1H), 5.06 (d,  $J = 6.8$  Hz, 1H), 4.50 – 4.39 (m, 1H), 3.97 (dd,  $J = 11.7, 4.8$ , 2H), 3.39 (td,  $J = 11.8, 1.9$  Hz, 2H), 2.95 – 2.75 (m, 4H), 2.46 – 2.34 (m, 2H), 2.06 – 1.97 (m, 2H), 1.80 – 1.69 (m, 5H), 1.37 – 1.23 (m, 2H).  $^{13}\text{C}$  NMR (101 MHz,  $\text{CDCl}_3$ )  $\delta$  158.5, 158.0 (ddd,  $J = 246.0, 11.0, 2.8$  Hz), 150.9 (ddd,  $J = 249.9, 15.4, 12.8$  Hz), 146.2, 145.3, (ddd,  $J = 246.8, 14.4, 4.0$  Hz), 128.6 (d,  $J = 10.6$  Hz), 127.8 (t,  $J = 9.7$  Hz), 112.6, 111.1 – 110.7 (m, 1C), 105.4 (dd,  $J = 28.6, 21.1$  Hz), 67.9, 62.4, 61.8, 53.0, 40.1, 39.3, 33.9, 31.8. HRMS (TOF, ES+),  $\text{C}_{23}\text{H}_{26}\text{D}_2\text{F}_3\text{N}_4\text{O}$   $[\text{M}+\text{H}]^+$  calc. mass 435.2335, found 435.2331. m.p. = 199 – 202 °C.

## **Drug Metabolism and Pharmacokinetics**

### **Intrinsic Clearance**

Determination of test compounds' *in vitro* intrinsic clearance ( $CL_{int}$ ) and prediction of hepatic clearance ( $CL_{hep}$ ) was performed via an in-house assay using human and/or rat hepatic microsomes with a substrate depletion approach according to a previously described methodology<sup>1-4</sup>.

### **CYP<sub>450</sub> Inhibition**

Initial determination of test compounds' potency for reversible inhibition of four major human CYP<sub>450</sub>s (1A2, 2C9, 2D6, 3A4) was performed via an in-house assay using human hepatic microsomes incubated with a 'cocktail' of isoform-specific probe substrates according to a previously described methodology<sup>1-4</sup>.

More definitive determination of VU6028418's potential for CYP<sub>450</sub> inhibition, including assessment of reversible vs. time-dependent (+/- NADPH) inhibition potencies of a broader set of enzymes (1A2, 2B6, 2C8, 2C9, 2C19, 2D6, and 3A4) was performed via contract by Q2 Solutions (Indianapolis, IN) using human hepatic microsomes with isoform-specific probe substrates according to their established standard assay methodologies.

### **CYP<sub>450</sub> Induction**

Determination of VU6028418's human CYP<sub>450</sub> (1A2, 2B6, 3A4) induction potential was performed via contract by Q2 Solutions (Indianapolis, IN) using cryopreserved hepatocytes from three donors and RT-PCR measurement of CYP<sub>450</sub> mRNA according to their established standard assay methodologies.

### **CYP<sub>450</sub> Metabolic Phenotype**

Determination of VU6028418's human CYP<sub>450</sub> metabolic phenotype (i.e., relative contribution of metabolism by 1A2, 2B6, 2C8, 2C9, 2C19, 2D6, 2E1, 2J2, 3A4, and 3A5 to  $CL_{hep}$ ) was performed via contract by Q2 Solutions (Indianapolis, IN) using recombinant enzymes and human hepatic microsomes with a relative activity factor (RAF) approach to prediction of fraction metabolized ( $f_{m,CYP}$ ) values for each enzyme in accordance with their established standard assay methodologies.

### **Metabolite Identification**

Qualitative *in vitro* profiling with tentative identification of VU6028418's metabolites was performed via contract by Q2 Solutions (Indianapolis, IN) using a four hour incubation of parent (10  $\mu$ M) in cryopreserved hepatocytes from multiple species (pooled male Sprague-Dawley rat, male beagle dog, male cynomolgus monkey, and mixed gender human) according to their established standard assay methodologies.

Results from these experiments revealed a total of 16 unique metabolites (8 primary; 8 secondary/tertiary) generated in one or more species. The proposed metabolite structures and their relative abundance (by %UV and %MS total peak areas) are shown in the following tables and figure:

**Table S1.**

**: Percent UV Total Peak Areas of VU6028418 and Metabolites in Each Species**

| Peak ID   | Tentative Metabolite Identification | % Total Peak Area |       |        |       |
|-----------|-------------------------------------|-------------------|-------|--------|-------|
|           |                                     | Rat               | Dog   | Monkey | Human |
| VU6028418 | Parent (P)                          | 80.69             | 88.57 | 87.11  | 86.16 |
| M1        | P + O                               | 0.99              | ND    | ND     | ND    |
| M2        | P + O                               | 11.88             | 3.33  | ND     | ND    |
| M4        | P + N-acetylglucosamine             | ND                | ND    | 2.22   | ND    |
| M6        | P + glucuronide                     | ND                | ND    | ND     | 1.79  |
| M7        | P + glucuronide                     | ND                | ND    | ND     | 0.89  |
| M8        | P + O + O                           | 6.44              | 8.10  | 8.44   | 11.16 |
| M14       | N-dealkylation                      | ND                | ND    | 2.22   | ND    |

ND = Not detected

**Table S2.**

**Percent MS Total Peak Areas of VU6028418 and Metabolites in Each Species**

| Peak ID   | Tentative Metabolite Identification | % Total Peak Area |       |        |        |
|-----------|-------------------------------------|-------------------|-------|--------|--------|
|           |                                     | Rat               | Dog   | Monkey | Human  |
| VU6028418 | Parent (P)                          | 82.62             | 90.12 | 88.35  | 93.06  |
| M1        | P + O                               | 0.79              | 0.06  | 0.01   | ND     |
| M2        | P + O                               | 11.80             | 3.23  | 0.02   | 0.01   |
| M3        | P + O                               | 0.42              | 1.04  | 0.50   | 0.82   |
| M4        | P + N-acetylglucosamine             | ND                | ND    | 3.31   | ND     |
| M5        | P – 2 H                             | 1.32              | 0.37  | 2.42   | 0.39   |
| M6        | P + glucuronide                     | ND                | ND    | 0.03   | 0.25   |
| M7        | P + glucuronide                     | ND                | ND    | 0.09   | 0.19   |
| M8        | P + O + O                           | 1.74              | 3.27  | 3.77   | 4.49   |
| M9        | P + O + O + O                       | 0.62              | 0.37  | ND     | ND     |
| M10       | P + O + O – 2 H                     | 0.17              | 0.01  | 0.17   | < 0.01 |
| M11       | P + O + O – 2 H                     | 0.09              | 0.25  | ND     | ND     |
| M12       | P + O – 2 H                         | 0.12              | 0.01  | 0.10   | 0.02   |
| M13       | P + O – 2 H                         | 0.10              | 0.62  | 0.44   | 0.57   |
| M14       | N-dealkylation                      | 0.07              | 0.11  | 0.80   | 0.20   |
| M15       | P – F + OH + GSH – 2 H              | 0.04              | 0.29  | ND     | ND     |
| M16       | P – F + OH + GSH – 2 H              | 0.10              | 0.26  | ND     | ND     |

ND = Not detected

Figure S1.

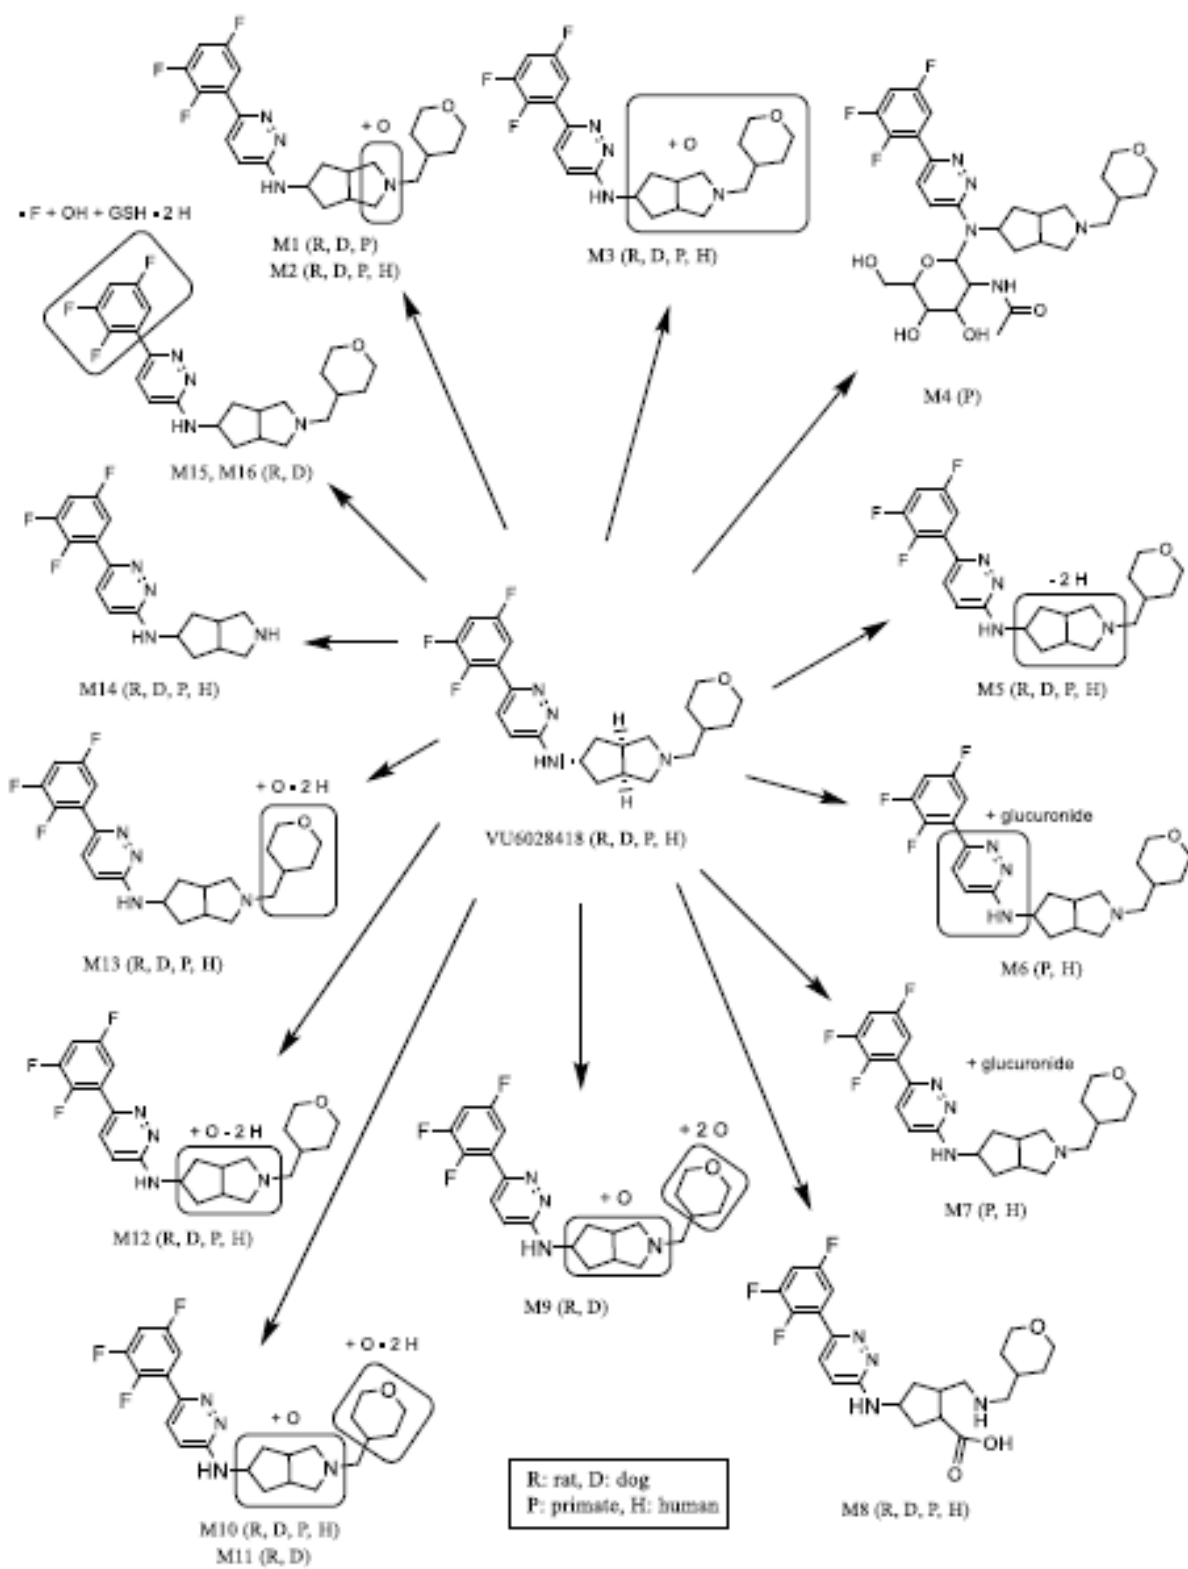

## P-gp Efflux

Initial determination of test compounds' potential for efflux by human P-gp at a single concentration (5  $\mu$ M; in duplicate) was performed via contract by Absorption Systems (Exton, PA) using a bidirectional permeability assay with MDCK-MDR1 cells in accordance with their established standard assay methodology.

Definitive assessment of VU6028418 efflux by human P-gp at a single concentration (5  $\mu$ M; in triplicate) was performed via contract by Solvo Biotechnology (Szeged, Hungary) using a bidirectional permeability assay with LLC-PK1-MDR1 cells in accordance with their established standard assay methodology.

## Rat IV/PO Pharmacokinetics

Determination of *in vivo* pharmacokinetics (PK) of VU6028418 following single IV (1 mg/kg, solution dose in 10% EtOH 40% PEG400 50% saline vehicle, 1 mL/kg) or PO (3 mg/kg, suspension dose in 0.1% Tween80 0.5% MC in water, 10 mL/kg) administration to male, Sprague-Dawley rat ( $n = 2$ , serially-sampled) was performed in-house using in-life phase, bioanalytical, and PK analysis methodologies essentially as previously described<sup>1-4</sup>.

## Rat PO Dose-Escalation Pharmacokinetics

Determination of *in vivo* PK of VU6028418 following single, escalating PO administrations (1, 3, 10, 30, 100, and 300 mg/kg, in 0.1% Tween80 0.5% MC in water, 10 mL/kg) to male, Sprague-Dawley rat ( $n = 3$ , serially sampled) was performed via contract by Frontage Laboratories (Exton, PA) in accordance with their established standard in-life phase, bioanalytical, and PK analysis methodologies. The results from this study are shown in the following tables.

**Table S3.**

**Pharmacokinetic Profile of VU6028418 following Single Oral Doses of 1, 3, 10, 30, 100 and 300 mg/kg to Male Sprague-Dawley Rats**

| Compound  | Dose Group | Animal | Nominal PO Dosage (mg/kg) | Actual PO Dosage (mg/kg) | No pts used for $t_{1/2}$ | $t_{1/2}$ (h) | $t_{max}$ (h) | $C_{max}$ (ng/mL) | $AUC_{last}$ (h <sup>2</sup> ng/mL) | $AUC_{Inf}$ (h <sup>2</sup> ng/mL) | AUC Extr (%) | $MRT_{Inf}$ (h) | AUC/D (h <sup>2</sup> kg <sup>2</sup> ng/mL/mg) |      |
|-----------|------------|--------|---------------------------|--------------------------|---------------------------|---------------|---------------|-------------------|-------------------------------------|------------------------------------|--------------|-----------------|-------------------------------------------------|------|
| VU6028418 | Group 1    | Rat 1  | 1.0                       | 1.01                     | 4                         | 19.8          | 2.00          | 34.0              | 700                                 | 756                                | 7            | 24.3            | 751                                             |      |
|           |            | Rat 2  | 1.0                       | 0.99                     | 3                         | 12.5          | 6.00          | 68.6              | 805                                 | 859                                | 6            | 16.0            | 870                                             |      |
|           |            | Rat 3  | 1.0                       | 1.01                     | 4                         | 13.7          | 4.00          | 38.5              | 1030                                | 1060                               | 3            | 21.7            | 1040                                            |      |
|           |            |        |                           | N                        |                           |               | 3             | 3                 | 3                                   | 3                                  | 3            | 3               | 3                                               | 3    |
|           |            |        |                           | Mean                     |                           |               | 15.3          | 4.00              | 47.0                                | 845                                | 892          | 5               | 20.7                                            | 887  |
|           |            |        |                           | SD                       |                           |               | 3.91          | 2.00              | 18.8                                | 169                                | 155          | 2               | 4.25                                            | 145  |
|           |            |        |                           | %CV                      |                           |               | 25.6          | 50.0              | 40.0                                | 20.0                               | 17.4         | 40.0            | 20.5                                            | 16.3 |

Last time point for  $AUC_{last}$ : 72 h for Rats 1 and Rat 3; 48 h for Rat 2

$T_{last}$  for all animals was greater than 3-fold the estimated  $t_{1/2}$ . Extrapolated PK parameters are reported.

| Compound  | Dose Group | Animal | Nominal PO Dosage (mg/kg) | Actual PO Dosage (mg/kg) | No pts used for $t_{1/2}$ | $t_{1/2}$ (h) | $t_{max}$ (h) | $C_{max}$ (ng/mL) | $AUC_{last}$ (h <sup>2</sup> ng/mL) | $AUC_{Inf}$ (h <sup>2</sup> ng/mL) | AUC Extr (%) | $MRT_{Inf}$ (h) | AUC/D (h <sup>2</sup> kg <sup>2</sup> ng/mL/mg) |      |
|-----------|------------|--------|---------------------------|--------------------------|---------------------------|---------------|---------------|-------------------|-------------------------------------|------------------------------------|--------------|-----------------|-------------------------------------------------|------|
| VU6028418 | Group 2    | Rat 4  | 3.0                       | 3.02                     | 3                         | 20.2          | 6.00          | 79.1              | 2950                                | 3240                               | 9            | 31.4            | 1080                                            |      |
|           |            | Rat 5  | 3.0                       | 2.98                     | 3                         | 16.2          | 0.50          | 74.5              | 1870                                | 2000                               | 6            | 27.9            | 670                                             |      |
|           |            | Rat 6  | 3.0                       | 3.00                     | 3                         | 19.1          | 0.50          | 112               | 3160                                | 3420                               | 8            | 27.7            | 1140                                            |      |
|           |            |        |                           | N                        |                           |               | 3             | 3                 | 3                                   | 3                                  | 3            | 3               | 3                                               | 3    |
|           |            |        |                           | Mean                     |                           |               | 18.5          | 2.33              | 88.5                                | 2660                               | 2890         | 8               | 29.0                                            | 963  |
|           |            |        |                           | SD                       |                           |               | 2.07          | 3.18              | 20.5                                | 692                                | 773          | 2               | 2.08                                            | 256  |
|           |            |        |                           | %CV                      |                           |               | 11.2          | 136.5             | 23.2                                | 26.0                               | 26.7         | 25.0            | 7.2                                             | 26.6 |

Last time point for  $AUC_{last}$ : 72 h for all animals

$T_{last}$  for all animals was greater than 3-fold the estimated  $t_{1/2}$ . Extrapolated PK parameters are reported.



| Compound  | Dose Group | Animal | Nominal PO Dosage (mg/kg) | Actual PO Dosage (mg/kg) | No pts used for t <sub>1/2</sub> | t <sub>1/2</sub> (h) | t <sub>max</sub> (h) | C <sub>max</sub> (ng/mL) | AUC <sub>0-∞</sub> (h <sup>2</sup> ng/mL) | AUC <sub>0-t</sub> (h <sup>2</sup> ng/mL) | AUC Extr (%) | MRT <sub>0-∞</sub> (h) | AUC/D (h <sup>2</sup> kg <sup>-1</sup> ng/mL/mg) |   |
|-----------|------------|--------|---------------------------|--------------------------|----------------------------------|----------------------|----------------------|--------------------------|-------------------------------------------|-------------------------------------------|--------------|------------------------|--------------------------------------------------|---|
| VU6028418 | Group 3    | Rat 7  | 10.0                      | 9.87                     | 3                                | 32.1                 | 0.50                 | 125                      | 6820                                      | 8860                                      | 23           | 50.8                   | 897                                              |   |
|           |            | Rat 8  | 10.0                      | 10.16                    | 3                                | 30.9                 | 0.25                 | 232                      | 6780                                      | 8370                                      | 19           | 42.8                   | 823                                              |   |
|           |            | Rat 9  | 10.0                      | 10.00                    | 3                                | 20.9                 | 2.00                 | 302                      | 8210                                      | 9000                                      | 9            | 28.3                   | 900                                              |   |
|           |            |        |                           |                          | N                                | 3                    | 3                    | 3                        | 3                                         | 3                                         | 3            | 3                      | 3                                                | 3 |
|           |            |        |                           |                          | Mean                             | 28.0                 | 0.92                 | 220                      | 7270                                      | 8740                                      | 20           | 40.6                   | 873                                              |   |
|           |            |        |                           |                          | SD                               | 6.15                 | 0.95                 | 89.1                     | 814                                       | 331                                       | 7            | 11.4                   | 43.6                                             |   |
|           |            |        | %CV                       | 22.0                     | 103.2                            | 40.5                 | 11.2                 | 3.8                      | 35.0                                      | 28.1                                      | 5.0          |                        |                                                  |   |

Last time point for AUC<sub>0-∞</sub>: 72 h for all animals

T<sub>1/2</sub> for Rats 7 and 8 was less than 3-fold but greater than twice the estimated t<sub>1/2</sub>. Extrapolated PK parameters are reported.

T<sub>1/2</sub> for Rat 9 was greater than 3-fold the estimated t<sub>1/2</sub>. Extrapolated PK parameters are reported.

| Compound  | Dose Group | Animal | Nominal PO Dosage (mg/kg) | Actual PO Dosage (mg/kg) | No pts used for t <sub>1/2</sub> | t <sub>1/2</sub> (h) | t <sub>max</sub> (h) | C <sub>max</sub> (ng/mL) | AUC <sub>0-∞</sub> (h <sup>2</sup> ng/mL) | AUC <sub>0-t</sub> (h <sup>2</sup> ng/mL) | AUC Extr (%) | MRT <sub>0-∞</sub> (h) | AUC/D (h <sup>2</sup> kg <sup>-1</sup> ng/mL/mg) |
|-----------|------------|--------|---------------------------|--------------------------|----------------------------------|----------------------|----------------------|--------------------------|-------------------------------------------|-------------------------------------------|--------------|------------------------|--------------------------------------------------|
| VU6028418 | Group 4    | Rat 10 | 30.0                      | 29.62                    | NR                               | NR                   | 4.00                 | 369                      | 17400                                     | NR                                        | NR           | NR                     | NR                                               |
|           |            | Rat 11 | 30.0                      | 30.00                    | 4                                | 16.1                 | 0.25                 | 738                      | 19100                                     | 20000                                     | 4            | 22.2                   | 666                                              |
|           |            | Rat 12 | 30.0                      | 30.37                    | 4                                | 28.8                 | 4.00                 | 833                      | 27200                                     | 33000                                     | 18           | 40.8                   | 1090                                             |
|           |            |        |                           |                          | N                                | 2                    | 3                    | 3                        | 3                                         | 2                                         | 2            | 2                      | 2                                                |
|           |            |        |                           |                          | Mean                             | 22.5                 | 2.75                 | 647                      | 21200                                     | 26500                                     | 10           | 31.5                   | 878                                              |
|           |            |        |                           |                          | SD                               |                      | 2.17                 | 245                      | 5240                                      | 9190                                      |              |                        |                                                  |
|           |            |        | %CV                       |                          | 78.9                             | 37.9                 | 24.7                 | 34.7                     |                                           |                                           |              |                        |                                                  |

Last time point for AUC<sub>0-∞</sub>: 72 h for all animals

NR: Not reported; extrapolated PK parameters were not reported for Rat 10 since t<sub>max</sub> was less than twice the estimated t<sub>1/2</sub> and AUC extrapolated was greater than 25%.

T<sub>1/2</sub> for Rat 11 was greater than 3-fold the estimated t<sub>1/2</sub>. Extrapolated PK parameters are reported.

T<sub>1/2</sub> for Rat 12 was less than 3-fold but greater than twice the estimated t<sub>1/2</sub>. Extrapolated PK parameters are reported.

| Compound  | Dose Group | Animal | Nominal PO Dosage (mg/kg) | Actual PO Dosage (mg/kg) | No pts used for t <sub>1/2</sub> | t <sub>1/2</sub> (h) | t <sub>max</sub> (h) | C <sub>max</sub> (ng/mL) | AUC <sub>0-∞</sub> (h <sup>2</sup> ng/mL) | AUC <sub>0-t</sub> (h <sup>2</sup> ng/mL) | AUC Extr (%) | MRT <sub>0-∞</sub> (h) | AUC/D (h <sup>2</sup> kg <sup>-1</sup> ng/mL/mg) |
|-----------|------------|--------|---------------------------|--------------------------|----------------------------------|----------------------|----------------------|--------------------------|-------------------------------------------|-------------------------------------------|--------------|------------------------|--------------------------------------------------|
| VU6028418 | Group 5    | Rat 13 | 100                       | 100.00                   | NR                               | NR                   | 8.00                 | 637                      | 31000                                     | NR                                        | NR           | NR                     | NR                                               |
|           |            | Rat 14 | 100                       | 100.86                   | NR                               | NR                   | 1.00                 | 1900                     | 77800                                     | NR                                        | NR           | NR                     | NR                                               |
|           |            | Rat 15 | 100                       | 101.54                   | NC                               | NC                   | 4.00                 | 1240                     | 66100                                     | NR                                        | NR           | NR                     | NR                                               |
|           |            |        |                           |                          | N                                |                      | 3                    | 3                        | 3                                         |                                           |              |                        |                                                  |
|           |            |        |                           |                          | Mean                             |                      | 4.33                 | 1260                     | 58300                                     |                                           |              |                        |                                                  |
|           |            |        |                           |                          | SD                               |                      | 3.51                 | 632                      | 24400                                     |                                           |              |                        |                                                  |
|           |            |        | %CV                       |                          | 81.1                             | 50.2                 | 41.9                 |                          |                                           |                                           |              |                        |                                                  |

Last time point for AUC<sub>0-∞</sub>: 72 h for all animals

NR: Not reported; extrapolated PK parameters were not reported for Rats 13 and 14 since t<sub>max</sub> was less than twice the estimated t<sub>1/2</sub> and AUC extrapolated was greater than 25%.

NC: Not calculated; extrapolated PK parameters were not calculated for Rat 15 since there was insufficient data to define the elimination phase.

| Compound  | Dose Group | Animal | Nominal PO Dosage (mg/kg) | Actual PO Dosage (mg/kg) | No pts used for t <sub>1/2</sub> | t <sub>1/2</sub> (h) | t <sub>max</sub> (h) | C <sub>max</sub> (ng/mL) | AUC <sub>0-∞</sub> (h <sup>2</sup> ng/mL) | AUC <sub>0-t</sub> (h <sup>2</sup> ng/mL) | AUC Extr (%) | MRT <sub>0-∞</sub> (h) | AUC/D (h <sup>2</sup> kg <sup>-1</sup> ng/mL/mg) |
|-----------|------------|--------|---------------------------|--------------------------|----------------------------------|----------------------|----------------------|--------------------------|-------------------------------------------|-------------------------------------------|--------------|------------------------|--------------------------------------------------|
| VU6028418 | Group 6    | Rat 16 | 300                       | 298.25                   | NC                               | NC                   | 72.0                 | 1850                     | 90400                                     | NC                                        | NC           | NC                     | NC                                               |
|           |            | Rat 17 | 300                       | 304.62                   | NC                               | NC                   | 4.00                 | 1860                     | 122000                                    | NC                                        | NC           | NC                     | NC                                               |
|           |            | Rat 18 | 300                       | 301.78                   | NC                               | NC                   | 72.0                 | 1760                     | 89500                                     | NC                                        | NC           | NC                     | NC                                               |
|           |            |        |                           |                          | N                                |                      | 3                    | 3                        | 3                                         |                                           |              |                        |                                                  |
|           |            |        |                           |                          | Mean                             |                      | 49.3                 | 1820                     | 101000                                    |                                           |              |                        |                                                  |
|           |            |        |                           |                          | SD                               |                      | 39.3                 | 55.1                     | 18500                                     |                                           |              |                        |                                                  |
|           |            |        | %CV                       |                          | 79.7                             | 3.0                  | 18.3                 |                          |                                           |                                           |              |                        |                                                  |

Last time point for AUC<sub>0-∞</sub>: 72 h for all animals

NC: Not calculated; extrapolated PK parameters were not calculated since there was insufficient data to define the elimination phase.

## Dog IV/PO Pharmacokinetics

Determination of *in vivo* pharmacokinetics (PK) of VU6028418 following single IV (1 mg/kg, solution dose in 10% EtOH 70% PEG400 20% saline vehicle, 1 mL/kg) or PO (3 mg/kg, suspension dose in 0.1% Tween80 0.5% MC in water, 10 mL/kg) administration to male, beagle dog (*n* = 3, serially-sampled) was performed via contract by Frontage Laboratories (Exton, PA) using their established standard in-life phase, bioanalytical, and PK analysis methodologies.

## Rat Brain and CSF Distribution

Determination of VU6028418's brain and CSF distribution, on a total and unbound concentration basis, following a single PO administration (3 m/kg, suspension dose in 0.1% Tween80 0.5% MC in water, 10 mL/kg) to male, Sprague-Dawley rat ( $n = 3$ , non-serially sampled from 0.25 to 72 hr) was performed in-house essentially in accordance with previously described methodologies<sup>3</sup>.

Calculation of the total brain to total plasma, unbound brain to unbound plasma, and total CSF to unbound plasma distribution partition coefficients ( $K_p$ ,  $K_{p,uu}$ ,  $K_{p,u}$ , respectively) was performed using mean AUCs from each matrix, and where relevant, values for fraction unbound in rat plasma or brain ( $f_{u,plasma}$ ,  $f_{u,brain}$ , respectively) determined *in vitro* from plasma protein binding or brain homogenate binding assays performed in-house in accordance with previously described methodologies<sup>1-4</sup>.

## Molecular Pharmacology

**Calcium Mobilization Assays.** Compound-evoked decreases to an EC<sub>80</sub> concentration of ACh in intracellular calcium were measured using Chinese hamster ovary (CHO) cells stably expressing rat or human muscarinic receptors (M<sub>1</sub>–M<sub>5</sub>; M<sub>2</sub> and M<sub>4</sub> cells were co-transfected with G<sub>q15</sub>). Cell culture reagents were purchased from Gibco-ThermoFisher Scientific (Waltham, MA) unless otherwise noted. Cells (15,000 cells/20 µL/well) were plated in Greiner black wall / clear bottom 384 well plates in F12 medium containing 10% FBS, 20 mM 2-[4-(2-hydroxyethyl)piperazin-1-yl]ethanesulfonic acid (HEPES), and 1X Antibiotic/Antimycotic. The cells were grown overnight at 37 °C in the presence of 5% CO<sub>2</sub>. The next day, the medium was removed and replaced with 20 µL of 1 µM Fluo-4, AM (Invitrogen, Carlsbad, CA) prepared as a 2.3 mM stock in dimethyl sulfoxide (DMSO) and mixed in a 1:1 ratio with 10% (w/v) pluronic acid F-127 (Invitrogen, Carlsbad, CA) and diluted in Assay Buffer (Hank's Balanced Salt Solution (HBSS), 20 mM HEPES, 4.16 mM sodium bicarbonate (Sigma-Aldrich, St. Louis, MO) and 2.5 mM Probenecid (Sigma-Aldrich, St. Louis, MO)) for 50 minutes at room temperature. Dye was removed and replaced with 20 µL of Assay Buffer. Compounds were serially diluted 1:3 into 10 point concentration response curves in DMSO using the AGILENT Bravo Liquid Handler (Atlantic Lab Equipment, Santa Clara, CA), transferred to daughter plates using an Echo acoustic plate reformatter (Labcyte, Sunnyvale, CA) and diluted in Assay Buffer to a 2X final concentration. Ca<sup>2+</sup> flux was measured using a Functional Drug Screening System 6000 or 7000 (FDSS6000/7000, Hamamatsu, Japan). After establishment of a fluorescence baseline for 2-3 seconds (2-3 images at 1 Hz; excitation, 480 ± 20 nm; emission, 540 ± 30 nm), 20 µL of test compound was added to the cells, and the response was measured. 140 seconds later, 10 µL (5X) of an EC<sub>20</sub> concentration of ACh (Sigma-Aldrich, St. Louis, MO) was added to the cells, and the response of the cells was measured. Approximately 125 seconds later, an EC<sub>80</sub> concentration of ACh was added. Calcium fluorescence was recorded as fold over basal fluorescence and raw data were normalized to the maximal response to agonist. Potency (IC<sub>50</sub>) and maximum response (% ACh Max) for compounds was determined using a four-parameter logistical equation using GraphPad Prism (La Jolla, CA) or the Dotmatics software platform:

$$y = bottom + \frac{top - bottom}{1 + 10^{(LogEC50 - A)Hillslope}}$$

where *A* is the molar concentration of the compound; *bottom* and *top* denote the lower and upper plateaus of the concentration-response curve; HillSlope is the Hill coefficient that describes the steepness of the curve; and EC<sub>50</sub> is the molar concentration of compound required to generate a response halfway between the *top* and *bottom*.

## Radioligand Binding Assays

Membranes were made from CHO cells stably expressing the human M4 receptor (co-expressing Gq15). Radioligand competition binding assays were performed as previously described.<sup>1</sup> In brief, M4 antagonists were serially diluted into assay buffer and added to each well of a 96-well plate, along with 10 µg/well cell membrane and approximately 80 pM [<sup>3</sup>H]-NMS (PerkinElmer, Boston, MA). Following a 3-hour incubation period on shaker at room temperature, the membrane-bound ligand was separated from free ligand by filtration through 96-well glass fiber filter plates (Unifilter-96, GF/B; PerkinElmer, Boston, MA). Forty microliters of scintillation fluid was added to each well, and the membrane-bound radioactivity was determined by scintillation counting (TopCount; PerkinElmer Life and Analytical Sciences, Boston, MA). Nonspecific binding was determined using 10 µM atropine. Data were analyzed with GraphPad Prism 7.0.

## Ancillary Pharmacology

Table S4.

### Cardiac Ion Channel Panel – Charles River Laboratories

| Ion Channel      | Mean % Inhibition | Standard Deviation | Standard Error | n |
|------------------|-------------------|--------------------|----------------|---|
| hCav1.2          | 24.5              | 2.6                | 1.5            | 3 |
| hCav3.2          | 41.7              | 10.9               | 6.3            | 3 |
| hHCN2            | 3.0               | 1.4                | 0.8            | 3 |
| hERG             | 96.0              | 1.8                | 0.8            | 5 |
| hKv1.3           | 24.2              | 9.6                | 5.5            | 3 |
| hKv1.5           | -2.9              | 5.8                | 3.4            | 3 |
| hKvLQT1/hminK    | 5.6               | 7.3                | 3.3            | 5 |
| hNav1.5 (Tonic)  | 19.0              | 6.2                | 3.1            | 4 |
| hNav1.5 (Phasic) | 21.7              | 6.1                | 3.0            | 4 |

The *in vitro* effects of VU6028418 were evaluated at room temperature using the QPatch HT<sup>®</sup> (Sophion Bioscience A/S, Denmark), an automatic parallel patch clamp system. VU6028418 was exposed to each ion channel at 10  $\mu$ M and tested in at least three cells (n  $\geq$  3). The duration of exposure to each test article concentration was a minimum of three (3) minutes.

Table S5.

### Lead Profiling Screen – Eurofins Panlabs

| Assay Name                              | Species | % inh at 10 $\mu$ M |
|-----------------------------------------|---------|---------------------|
| Adenosine A2A                           | hum     | 2                   |
| Adenosine A3                            | hum     | 4                   |
| Adrenergic $\alpha$ 1A                  | hum     | 11                  |
| Adrenergic $\alpha$ 1B                  | hum     | 3                   |
| Adrenergic $\alpha$ 1D                  | hum     | 15                  |
| Adrenergic $\alpha$ 2A                  | hum     | -1                  |
| Adrenergic $\beta$ 1                    | hum     | 11                  |
| Adrenergic $\beta$ 2                    | hum     | 1                   |
| Androgen (Testosterone)                 | hum     | 4                   |
| Bradykinin B1                           | hum     | 10                  |
| Bradykinin B2                           | hum     | 4                   |
| Calcium Channel L-Type, Benzothiazepine | hum     | 1                   |
| Calcium Channel L-Type, Dihydropyridine | rat     | 50                  |
| Calcium Channel N-Type                  | rat     | 23                  |
| Cannabinoid CB1                         | rat     | -2                  |
| Dopamine D1                             | hum     | 3                   |
| Dopamine D2S                            | hum     | 30                  |
| Dopamine D3                             | hum     | 14                  |
| Dopamine D4.4                           | hum     | 15                  |
| Endothelin ETA                          | hum     | 4                   |
| Endothelin ETB                          | hum     | -5                  |
| Epidermal Growth Factor (EGF)           | hum     | 7                   |
| Estrogen ER $\alpha$                    | hum     | -1                  |
| GABAA, Flunitrazepam, Central           | hum     | 0                   |
| GABAA, Muscimol, Central                | rat     | -7                  |
| GABAB1A                                 | rat     | 15                  |
| Glucocorticoid                          | hum     | 2                   |
| Glutamate, Kainate                      | hum     | 5                   |
| Glutamate, NMDA, Agonism                | rat     | -6                  |

|                                                     |       |     |
|-----------------------------------------------------|-------|-----|
| Glutamate, NMDA, Glycine                            | rat   | 5   |
| Glutamate, NMDA, Phencyclidine                      | rat   | 5   |
| Histamine H1                                        | hum   | 13  |
| Histamine H2                                        | hum   | -2  |
| Histamine H3                                        | hum   | 47  |
| Imidazoline I2, Central                             | rat   | -8  |
| Interleukin IL-1 R1                                 | hum   | 3   |
| Leukotriene, Cysteinyl CysLT1                       | hum   | 6   |
| Melatonin MT1                                       | hum   | 0   |
| Muscarinic M1                                       | hum   | 22  |
| Muscarinic M2                                       | hum   | 61  |
| Muscarinic M3                                       | hum   | 42  |
| Neuropeptide Y Y1                                   | hum   | -6  |
| Neuropeptide Y Y2                                   | hum   | -1  |
| Nicotinic Acetylcholine $\alpha$ 1, Bungarotoxin    | hum   | 10  |
| Nicotinic Acetylcholine $\alpha$ 3 $\beta$ 4        | hum   | 43  |
| Opiate $\delta$ 1 (OP1, DOP)                        | hum   | 4   |
| Opiate $\kappa$ (OP2, KOP)                          | hum   | 14  |
| Opiate $\mu$ (OP3, MOP)                             | hum   | 21  |
| Phorbol Ester                                       | mouse | 2   |
| Platelet Activating Factor (PAF)                    | hum   | -1  |
| Potassium Channel [KATP]                            | ham   | -4  |
| Potassium Channel hERG                              | hum   | 64  |
| Prostanoid EP4                                      | hum   | 5   |
| Purinergic P2X                                      | rat   | -4  |
| Purinergic P2Y, Non-Selective                       | rat   | 12  |
| Rolipram                                            | rat   | 3   |
| Serotonin (5-Hydroxytryptamine) 5-HT1A              | hum   | -3  |
| Serotonin (5-Hydroxytryptamine) 5-HT2B              | hum   | 9   |
| Serotonin (5-Hydroxytryptamine) 5-HT3               | hum   | 12  |
| Sigma $\sigma$ 1                                    | hum   | 101 |
| Sodium Channel, Site 2                              | rat   | 34  |
| Tachykinin NK1                                      | hum   | 17  |
| Thyroid Hormone                                     | rat   | 14  |
| Transporter, Dopamine (DAT)                         | hum   | 29  |
| Transporter, GABA                                   | rat   | -5  |
| Transporter, Norepinephrine (NET)                   | hum   | 13  |
| Transporter, Serotonin (5-Hydroxytryptamine) (SERT) | hum   | 5   |

## Haloperidol-Induced Catalepsy

All rodent PK experiments were conducted in accordance with the National Institute of Health regulations of animal care covered in Principles of Laboratory Animal Care (National Institutes of Health publication 85-23, revised 1985) and were approved by the Institutional Animal Care and Use Committee.

Adult male Sprague-Dawley rats (weighing 290-326 grams) were used for the haloperidol-induced catalepsy studies. The rats were injected with 1.5 mg/kg of haloperidol (i.p.; 1 ml/kg) and then returned to the home cage. The rats were then administered VU6028418 (8i) (0.3-3 mg/kg p.o.; 10 ml/kg) or vehicle (2% Tween 80/0.5% methylcellulose) thirty minutes later. Cataleptic behavior was determined one hour later by placing the forelimbs on a bar raised 6 cm above the table and recording the amount of time it takes for the rat to withdraw the forelimbs. Data are expressed as mean latency to withdraw + SEM or percent inhibition of catalepsy + SEM. The data for these dose-response studies were analyzed by a one-way ANOVA. If there was a main effect of dose, then each dose group was compared with vehicle treated control animals using GraphPad Prism (version 4.03, GraphPad, La Jolla, CA).<sup>5</sup>

## References

1. Wenthur, C. J.; Morrison, R.; Felts, A. S.; Smith, K. A.; Engers, J. L.; Byers, F. W.; Daniels, J. S.; Emmitte, K. A.; Conn, P. J.; Lindsley, C. W. Discovery of (*R*)-(2-Fluoro-4-((-4-methoxyphenyl)ethynyl)phenyl) (3-Hydroxypiperidin-1-yl)methanone (ML337), An mGlu3 Selective and CNS Penetrant Negative Allosteric Modulator (NAM). *J. Med. Chem.* **2013**, *56*, 5208-5212.
2. Bridges, T. M.; Rook, J. M.; Noetzel, M. J.; Morrison, R. D.; Zhou, Y.; Gogliotti, R. D.; Vinson, P. N.; Xiang, Z.; Jones, C. K.; Niswender, C. M.; Lindsley, C. W.; Stauffer, S. R.; Conn, J. P.; Daniels, J. S. Biotransformation of a Novel Positive Allosteric Modulator of Metabotropic Glutamate Receptor Subtype 5 Contributes to Seizure-Like Adverse Events in Rats Involving a Receptor Agonism-Dependent Mechanism. *Drug. Metab. Dispos.* **2013**, *41*, 1703-1714.
3. Engers, D. W.; Blobaum, A. L.; Gogliotti, R. D.; Cheung, Y.-Y.; Salovich, J. M.; Garcia-Barrantes, P. M.; Daniels, J. S.; Morrison, R.; Jones, C. K.; Soars, M. G.; Zhuo, X.; Hurley, J.; Macor, J. E.; Bronson, J. J.; Conn, P. J.; Lindsley, C. W.; Niswender, C. M.; Hopkins, C. R. Discovery, Synthesis, and Preclinical Characterization of N-(3-Chloro-4-fluorophenyl)-1H-pyrazolo[4,3-b]pyridin-3-amine (VU0418506), a Novel Positive Allosteric Modulator of the Metabotropic Glutamate Receptor 4 (mGlu4). *ACS Chem. Neurosci.* **2016**, *7*, 1192-1200.
4. Reed, C. W.; Yohn, S. E.; Washecheck, J. P.; Roenfanz, H. F.; Quitlig, M. C.; Luscombe, V. B.; Jenkins, M. T.; Rodriguez, A. L.; Engers, D. W.; Blobaum, A. L.; Conn, P. J.; Niswender, C. M.; Lindsley, C. W. Discovery of an Orally Bioavailable and Central Nervous System (CNS) Penetrant mGlu7 Negative Allosteric Modulator (NAM) in Vivo Tool Compound: N-(2-(1H-1,2,4-triazol-1-yl)-5-(trifluoromethoxy)phenyl)-4-(cyclopropylmethoxy)-3-methoxybenzamide (VU6012962). *J. Med. Chem.* **2019**, *62*, 1690-1695.

5. Moehle, M. S.; Bender, A. M.; Dickerson, J. W.; Foster, D. J.; Qi, A.; Donsante, Y.; Peng, W.; Bryant, Z.; Stillwell, K. J.; Bridges, T. M.; Chang, S.; Watson, K. J.; O'Neill, J. C.; Engers, J. L.; Peng, L.; Rodriguez, A. L.; Niswender, C. M.; Lindsley, C. W.; Hess, E. J.; Conn, P. J.; Rook, J. M. Discovery of the First Selective M4 Muscarinic Acetylcholine Receptor Antagonists with In Vivo Anti-Parkinsonian and Anti-Dystonic Efficacy. *ACS Pharmacol. Transl. Sci.* **2021**, ASAP.
